# Supplementary material for: Association of blood trihalomethane concentrations with asthma in US adolescents: nationally representative cross-sectional study
Source: PubMed Central journal article supplement — Eur Respir J. 2022 May 26;59(5):2101440. doi: 10.1183/13993003.01440-2021 (PMC9133491; doi:10.1183/13993003.01440-2021), 2022-05-26

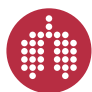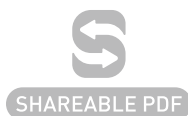

# Association of blood trihalomethane concentrations with asthma in US adolescents: nationally representative cross-sectional study

Yang Sun<sup>1,2</sup>, Peng-Fei Xia<sup>3</sup>, Jing Xie<sup>4</sup>, Vicente Mustieles<sup>5,6,7</sup>, Yu Zhang<sup>1,2</sup>, Yi-Xin Wang <sup>2,8</sup> and Carmen Messerlian<sup>1,2</sup>

<sup>1</sup>Dept of Environmental Health, Harvard T.H. Chan School of Public Health, Boston, MA, USA. <sup>2</sup>Dept of Epidemiology, Harvard T.H. Chan School of Public Health, Boston, MA, USA. <sup>3</sup>Dept of Epidemiology and Biostatistics, Ministry of Education Key Laboratory of Environment and Health, School of Public Health, Tongji Medical College, Huazhong University of Science and Technology, Wuhan, China. <sup>4</sup>Dept of Gastroenterology, Guangzhou Institute of Pediatrics, Guangzhou Women and Children's Medical Center, Guangzhou Medical University, Guangzhou, China. <sup>5</sup>Center for Biomedical Research (CIBM), University of Granada, Granada, Spain. <sup>6</sup>Instituto de Investigación Biosanitaria IBS GRANADA, Granada, Spain. <sup>7</sup>Consortium for Biomedical Research in Epidemiology and Public Health (CIBERESP), Granada, Spain. <sup>8</sup>Dept of Nutrition, Harvard T.H. Chan School of Public Health, Boston, MA, USA.

Corresponding author: Yi-Xin Wang ([yixinwang@hsph.harvard.edu](mailto:yixinwang@hsph.harvard.edu))

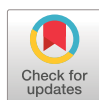

Shareable abstract (@ERSpublications)

Among a representative sample of 2359 US adolescents, we found that exposure to THMs was associated with a greater risk of asthma, particularly among those who were co-exposed to tobacco smoke <https://bit.ly/3mpHxgq>

**Cite this article as:** Sun Y, Xia P-F, Xie J, *et al.* Association of blood trihalomethane concentrations with asthma in US adolescents: nationally representative cross-sectional study. *Eur Respir J* 2022; 59: 2101440 [DOI: 10.1183/13993003.01440-2021].

This single-page version can be shared freely online.

Copyright ©The authors 2022.

This version is distributed under the terms of the Creative Commons Attribution Non-Commercial Licence 4.0. For commercial reproduction rights and permissions contact [permissions@ersnet.org](mailto:permissions@ersnet.org)

Received: 20 May 2021

Accepted: 29 Sept 2021

## Abstract

**Background** Population studies show that the use of swimming pools is associated with the risk of asthma and allergic diseases among children. Our objective was to explore the associations between blood trihalomethane (THM) concentrations and asthma among US adolescents, and assess to what extent the association is modified by active tobacco smoke exposure.

**Methods** We included 2359 adolescents aged 12–19 years with measured blood concentrations of chloroform (trichloromethane (TCM)), bromodichloromethane (BDCM), dibromochloromethane (DBCM) and bromoform (tribromomethane (TBM)) from the National Health and Nutrition Examination Survey 2005–2012. Logistic regression models were fitted to assess the odds ratios for the association of blood THM concentrations (three or four categories) with the risk of self-reported current and ever (lifetime) asthma.

**Results** Blood DBCM concentrations were associated with a higher risk of ever asthma among all adolescents (OR 1.54 (95% CI 1.07–2.21), comparing the extreme exposure categories). The relationship was stronger among adolescents exposed to tobacco smoke (OR 3.96 (95% CI 1.89–8.30), comparing the extreme exposure categories). We also found positive relationships between blood brominated THM concentrations (sum of BDCM, DBCM and TBM) and risk of ever asthma and between blood DBCM and brominated THM concentrations and risk of current asthma among adolescents with tobacco smoke exposure. The relative excess risk of ever asthma due to the interaction between high blood DBCM and brominated THM concentrations and tobacco smoke exposure was 1.87 (95% CI 0.30–3.43) and 0.78 (95% CI 0.07–1.49), respectively.

**Conclusions** Exposure to THMs is associated with a higher risk of asthma in adolescents, particularly among those exposed to tobacco smoke.

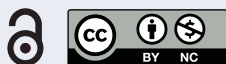

Supplement: ERJ-01440-2021.Shareable.pdf [file ERJ-01440-2021.Shareable.pdf]
